# Supplementary material for: Impaired Th17 polarization of phenotypically naive CD4+ T-cells during chronic HIV-1 infection and potential restoration with early ART
Source: PubMed Central journal article supplement (PMC4438463; doi:10.1186/s12977-015-0164-6), 2015-04-30

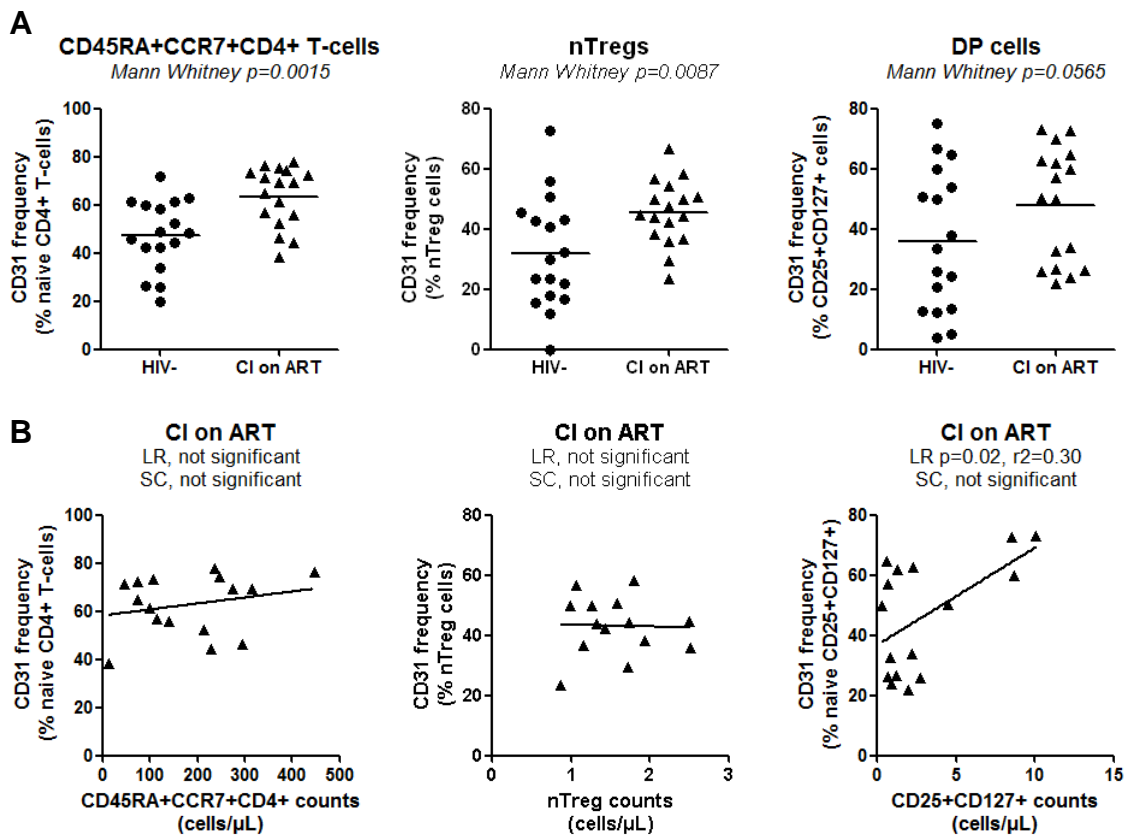

Supplement: 12977_2015_164_MOESM5_ESM.pdf [file 12977_2015_164_MOESM5_ESM.pdf]
